# Supplementary material for: A general approach to N-heterocyclic scaffolds using domino Heck–aza-Michael reactions
Source: Royal Society of Chemistry journal article supplement (doi:10.1039/c0ob00835d), 2010-11-12

# A General Approach to *N*-Heterocyclic Scaffolds Using Domino Heck-aza-Michael Reactions

Daniel L. Priebbenow, Scott G. Stewart, Frederick M. Pfeffer.

## <sup>1</sup>H and <sup>13</sup>C NMR Spectra

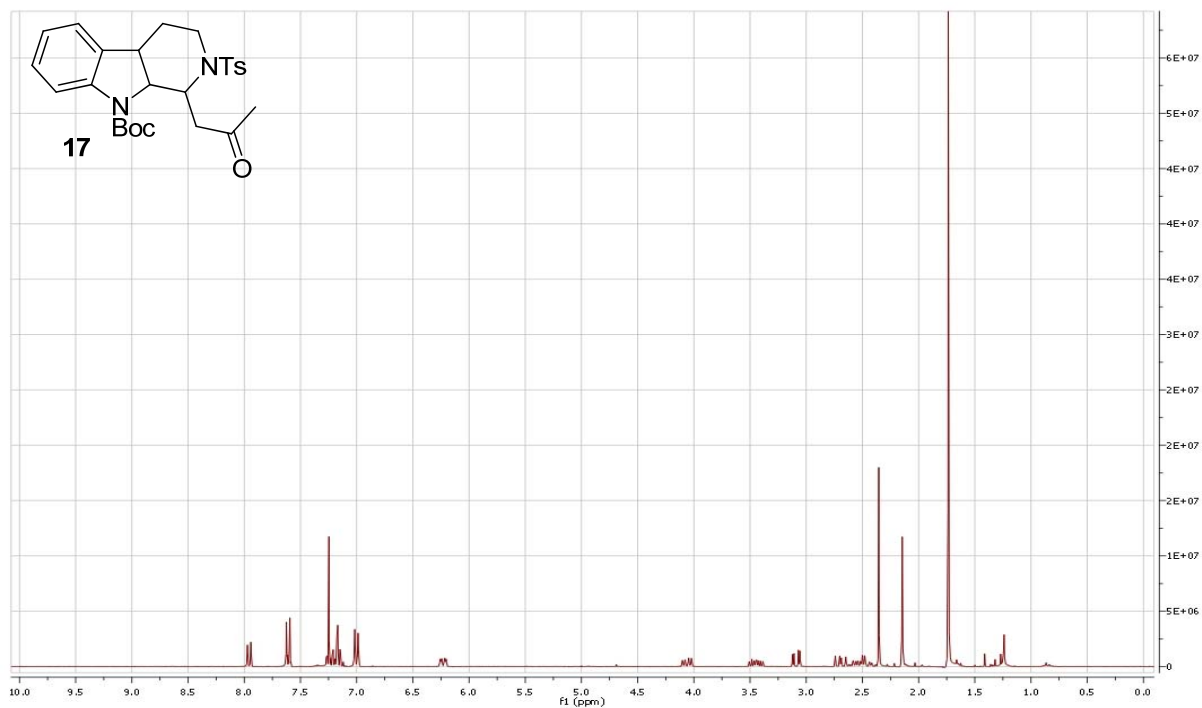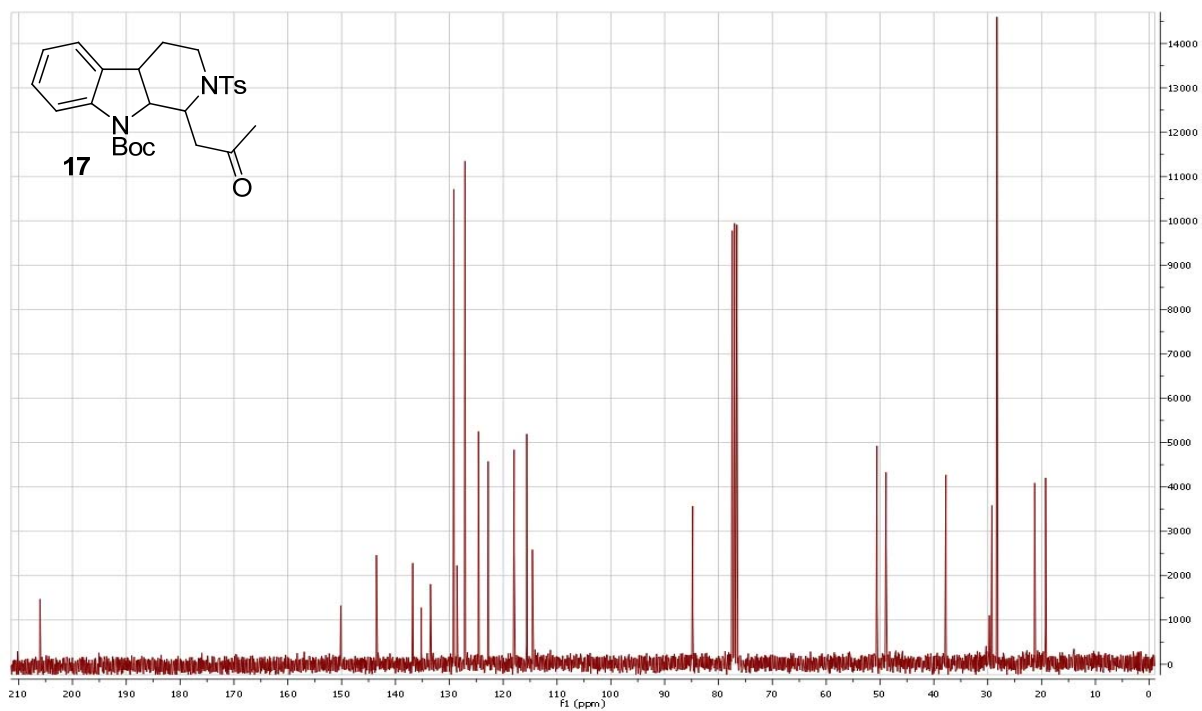

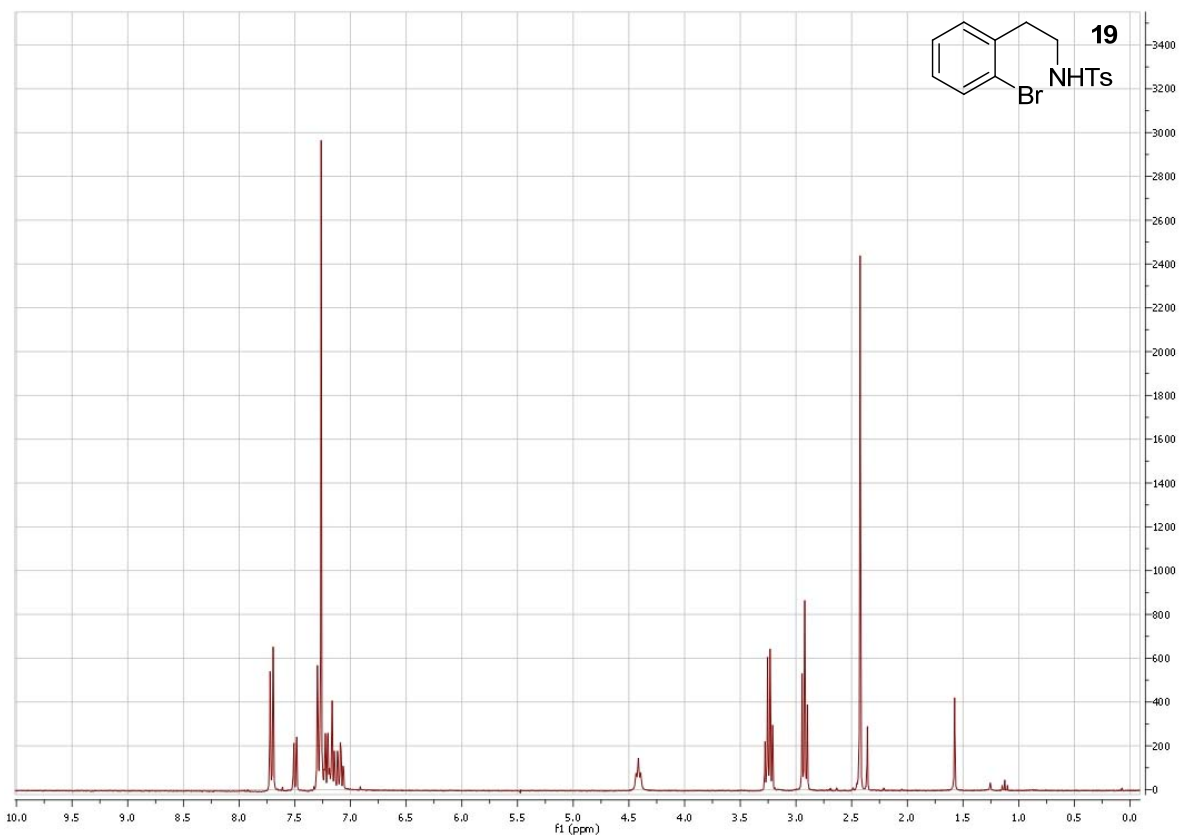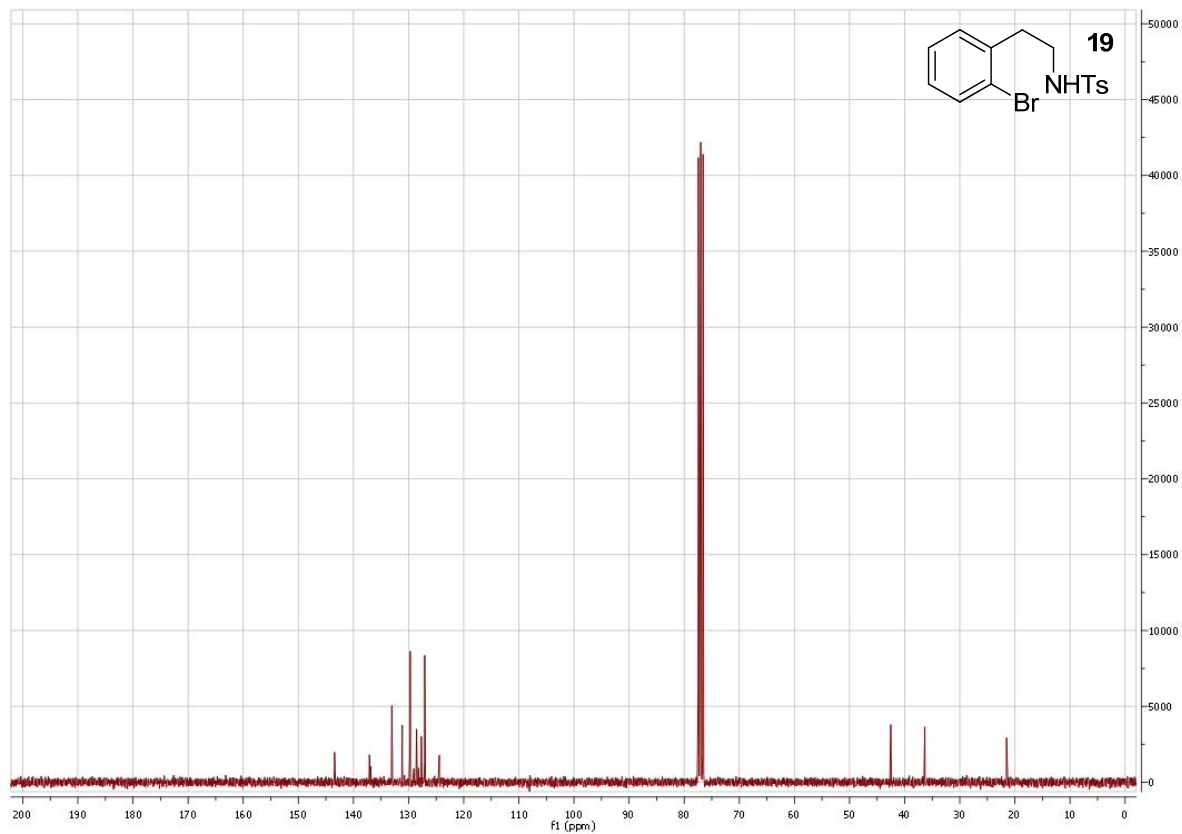

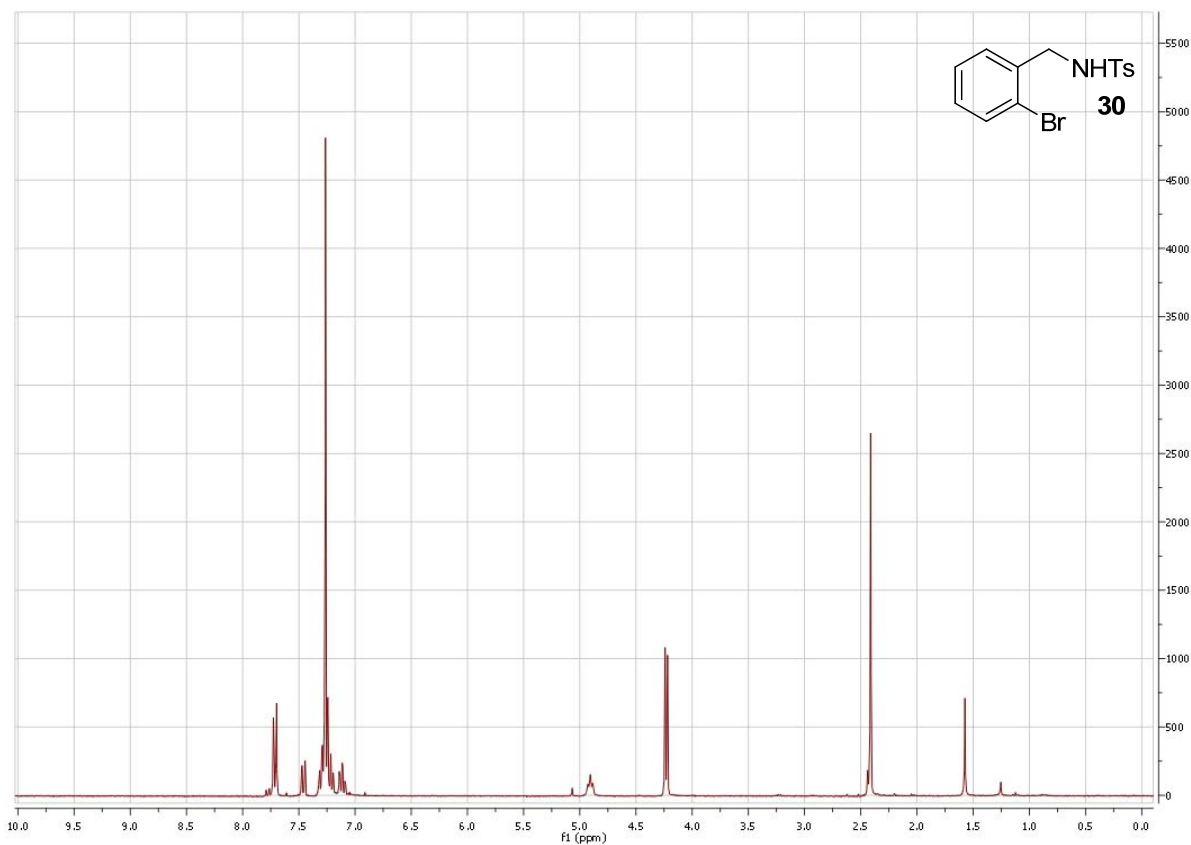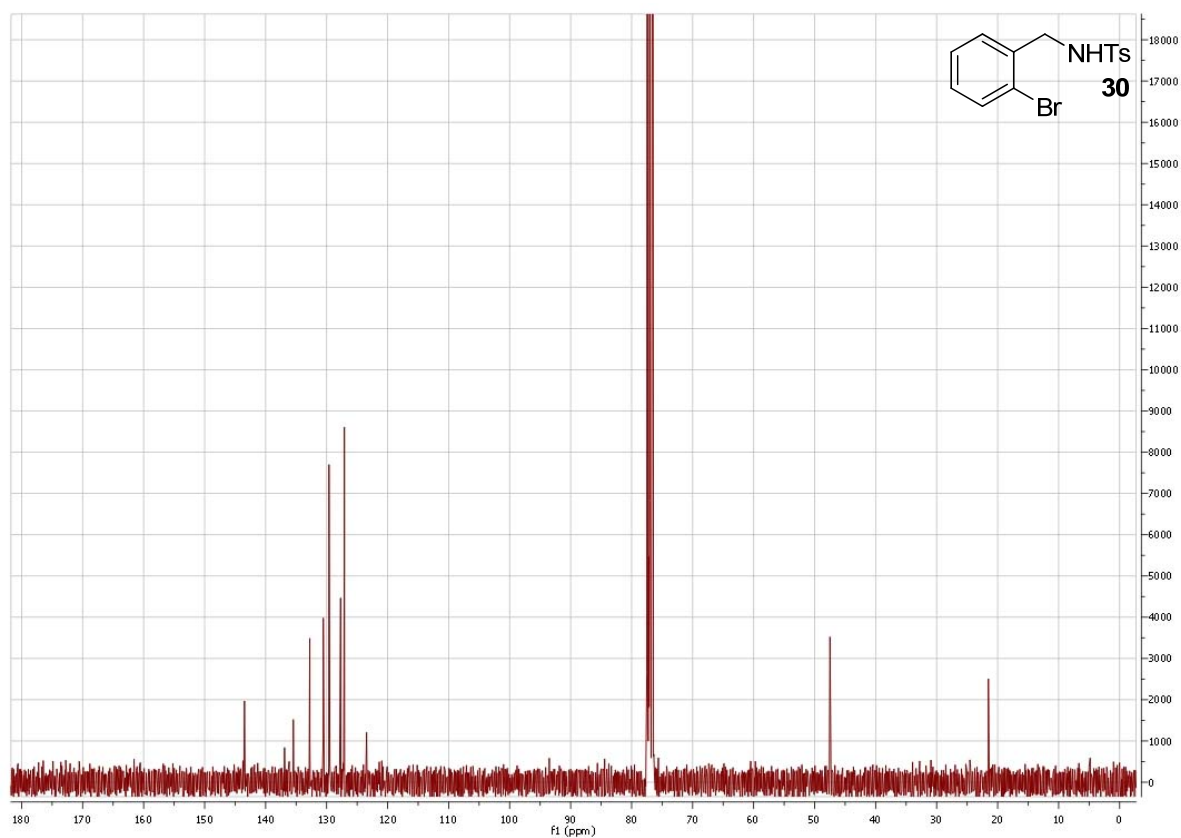

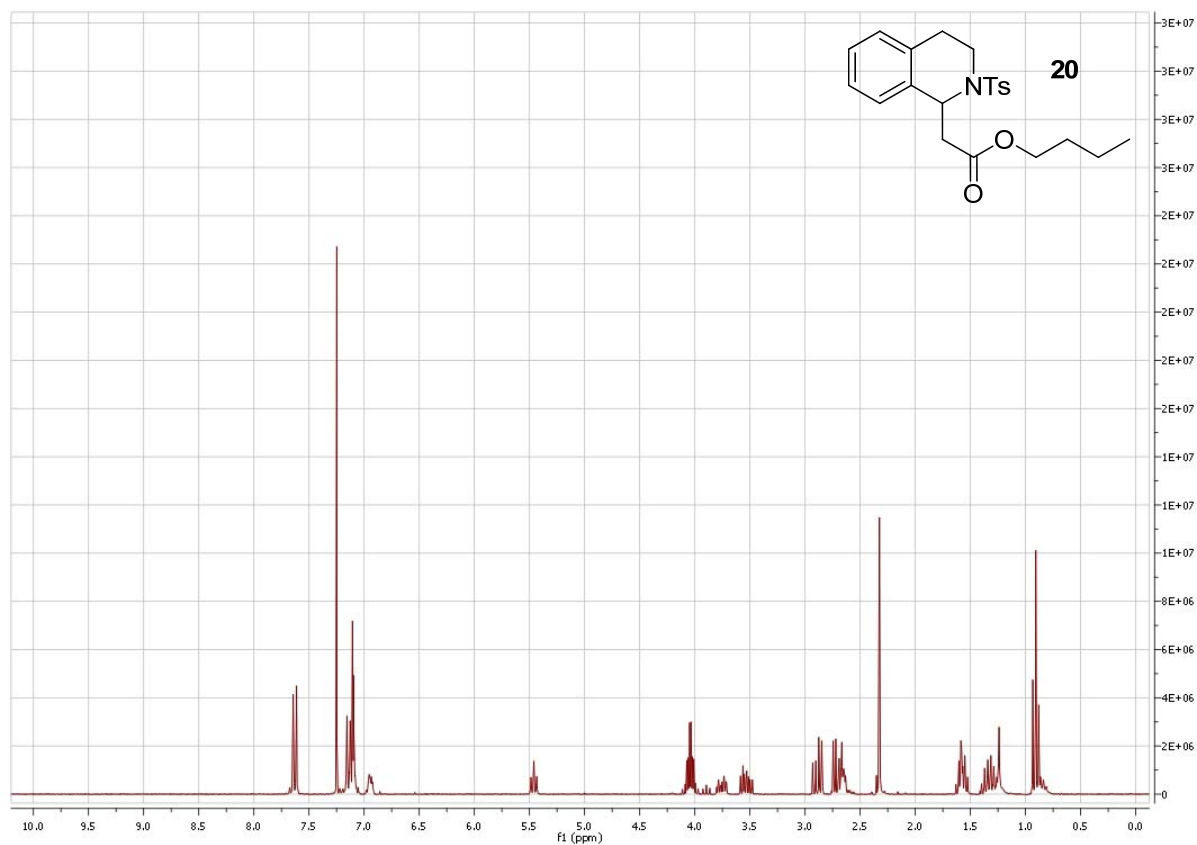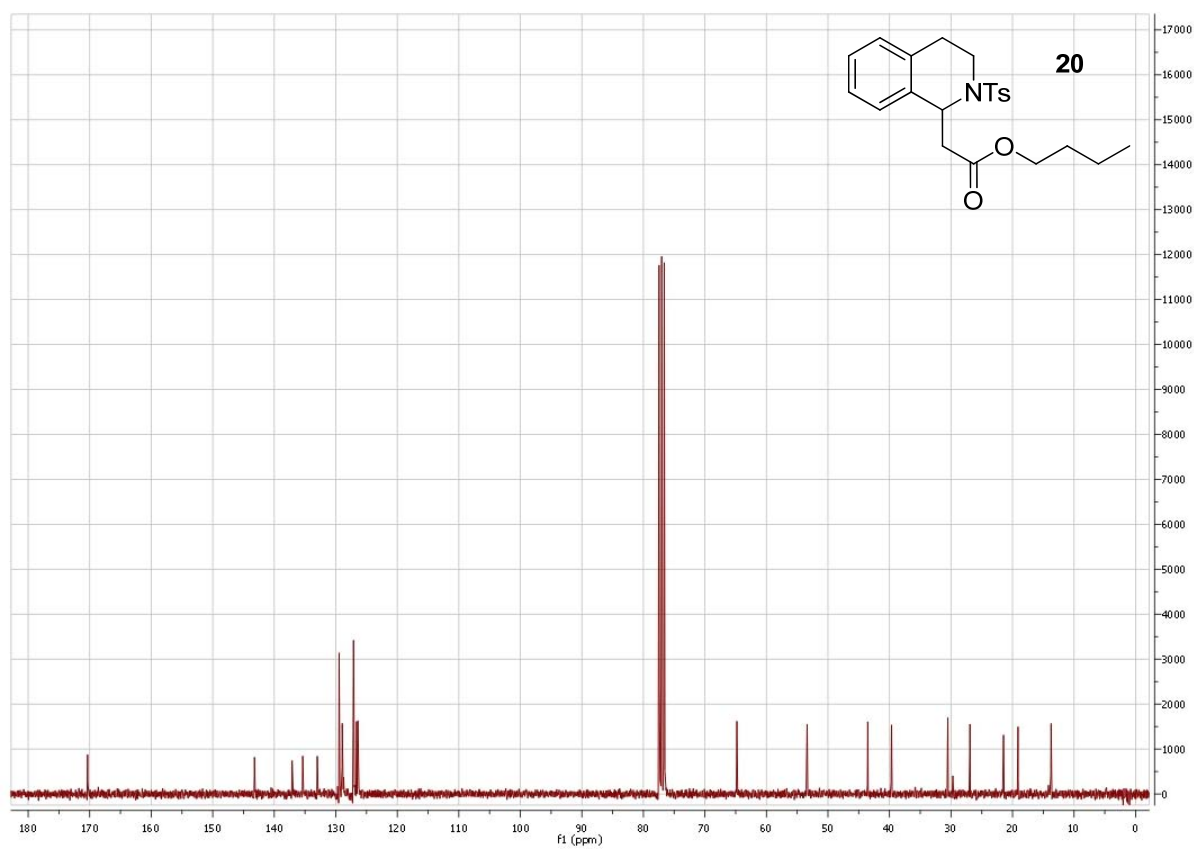

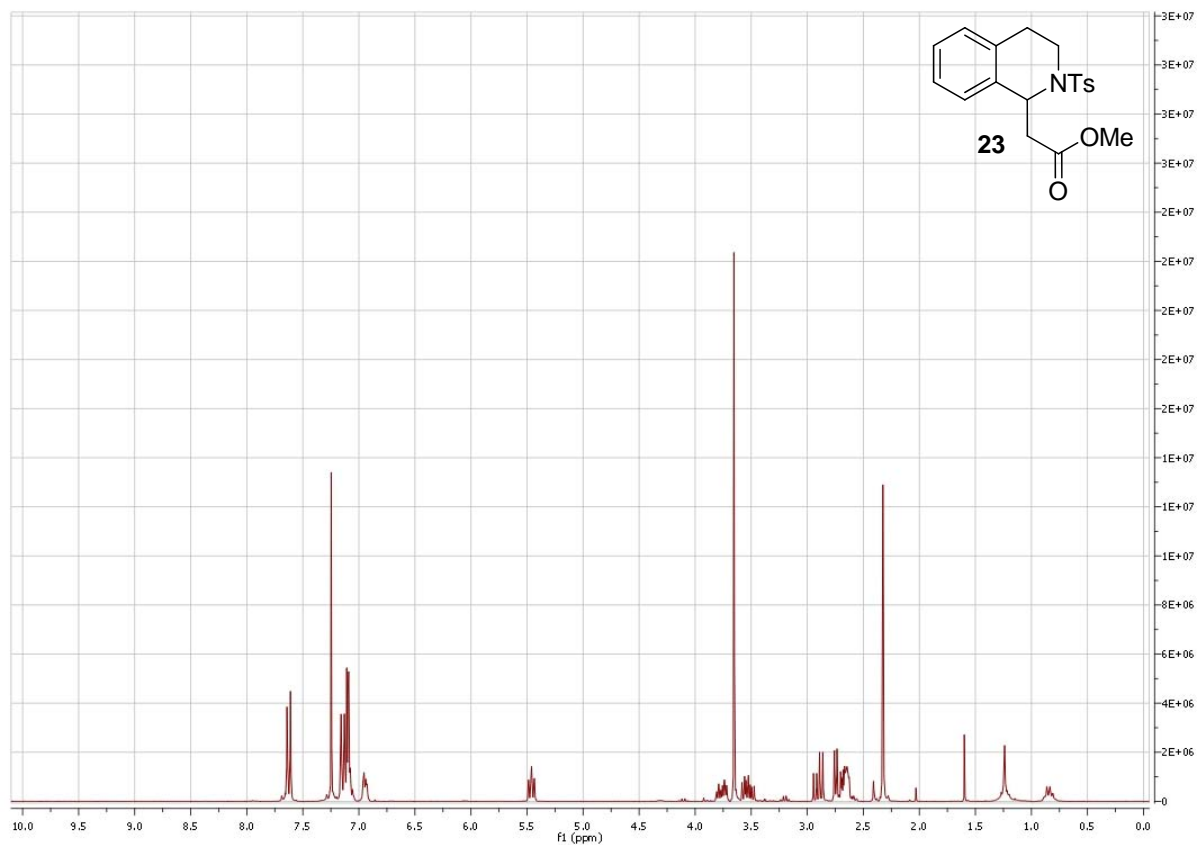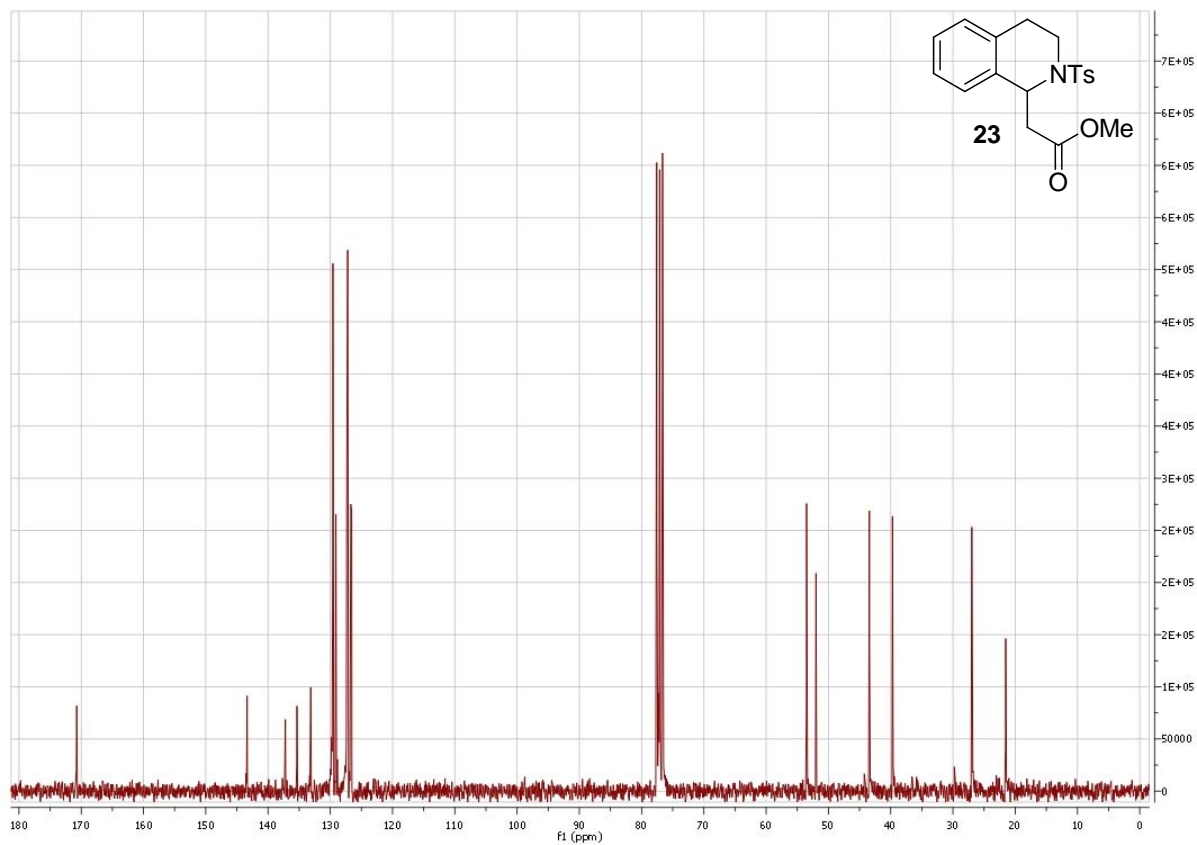

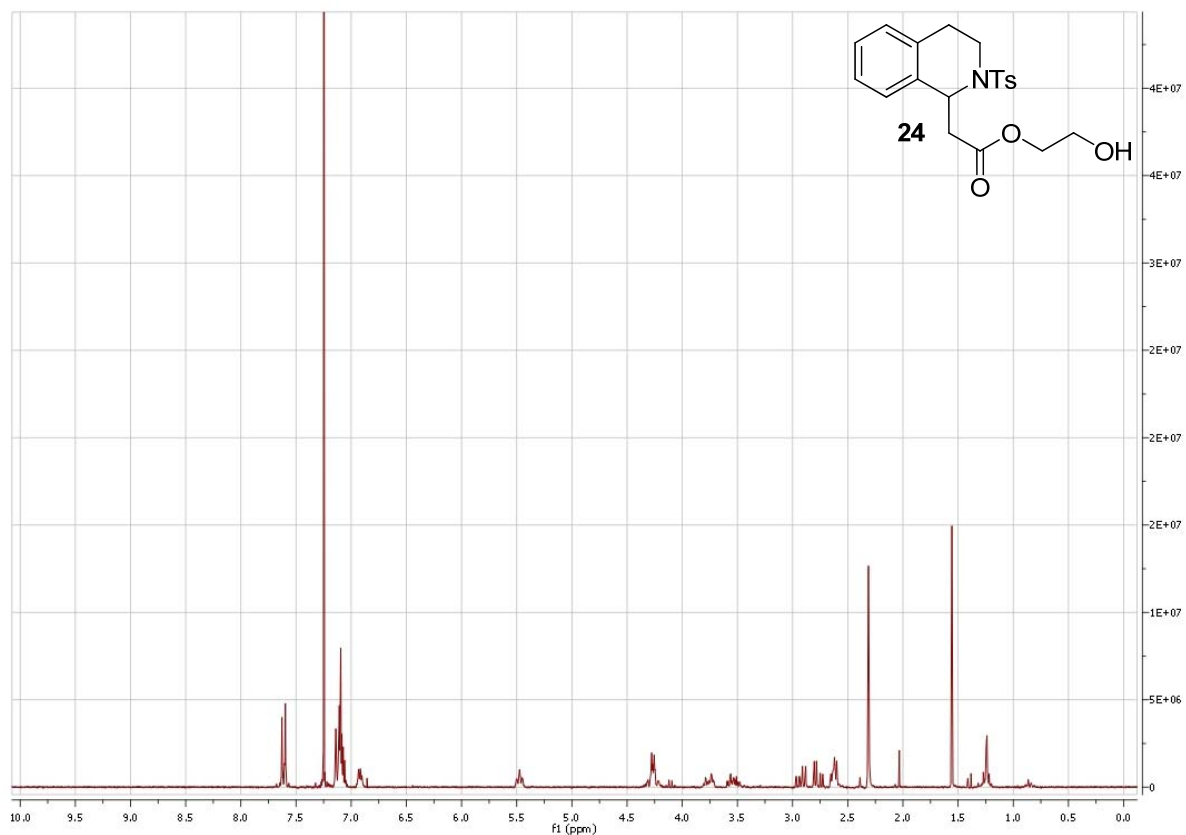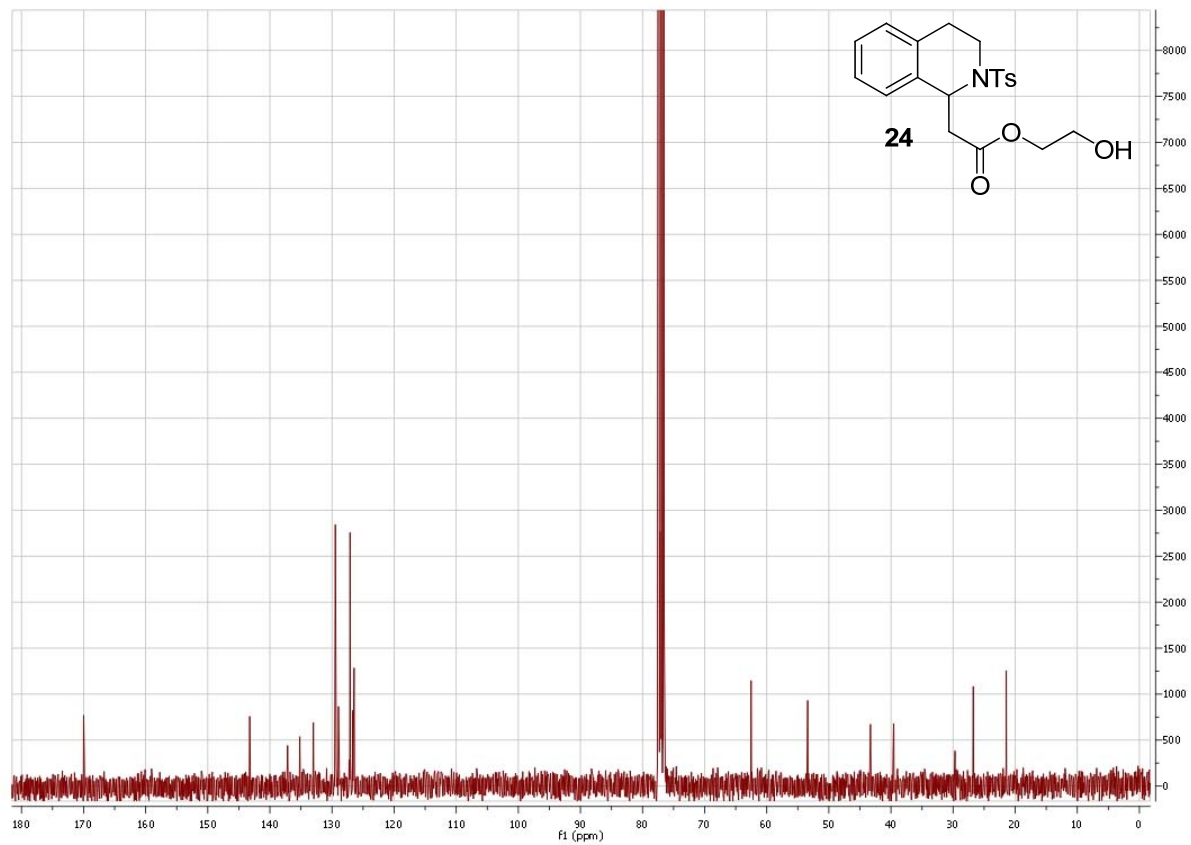

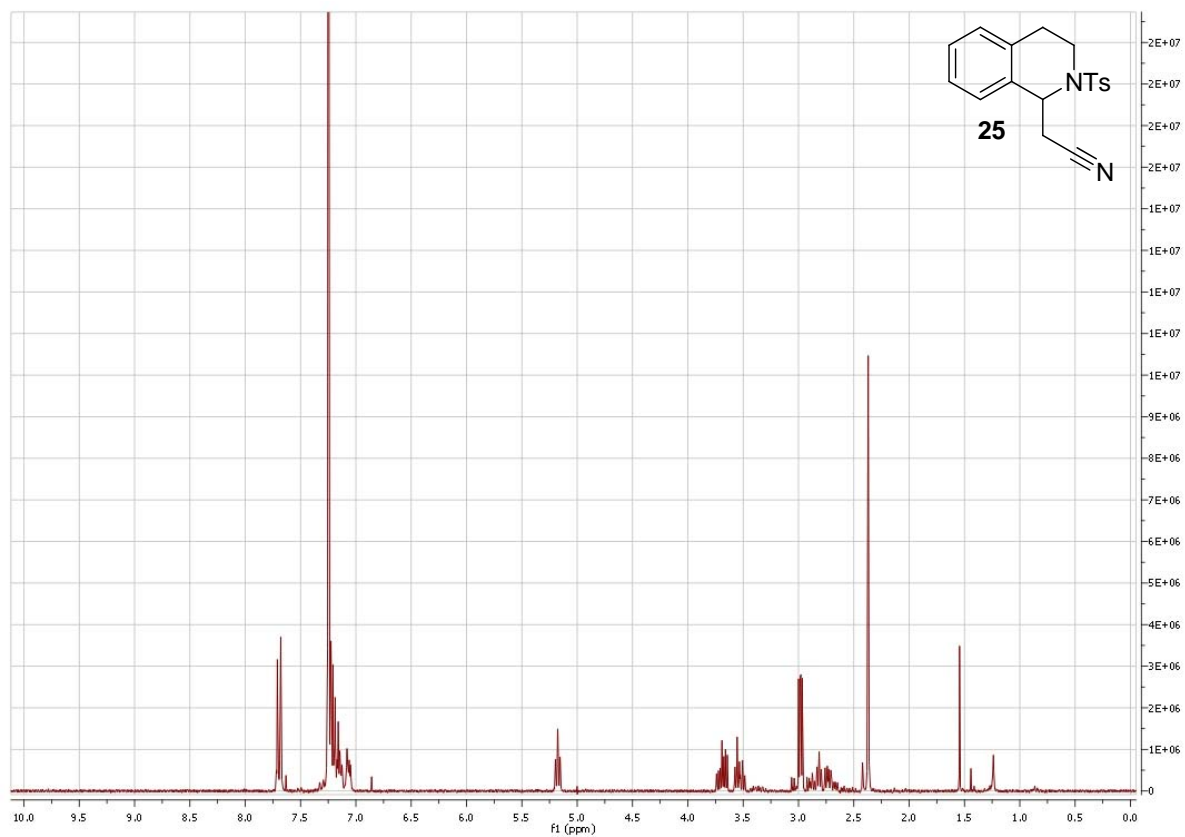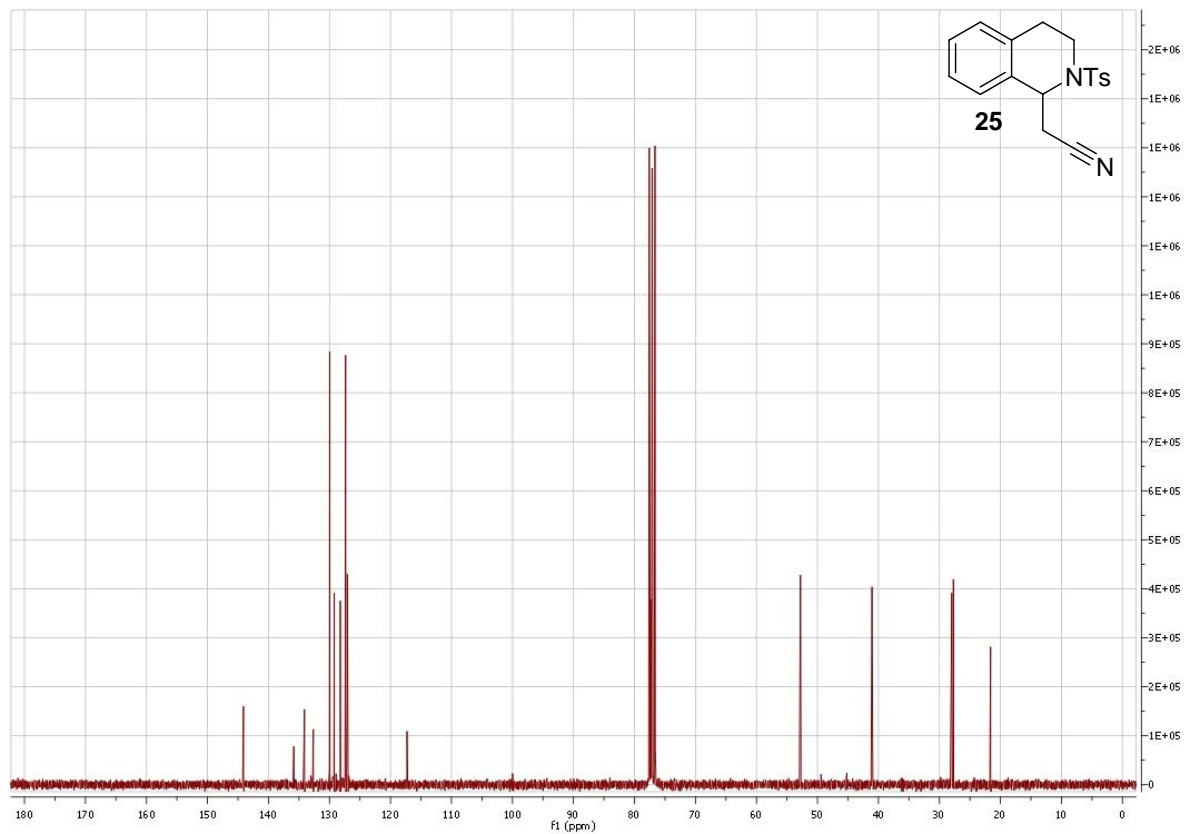

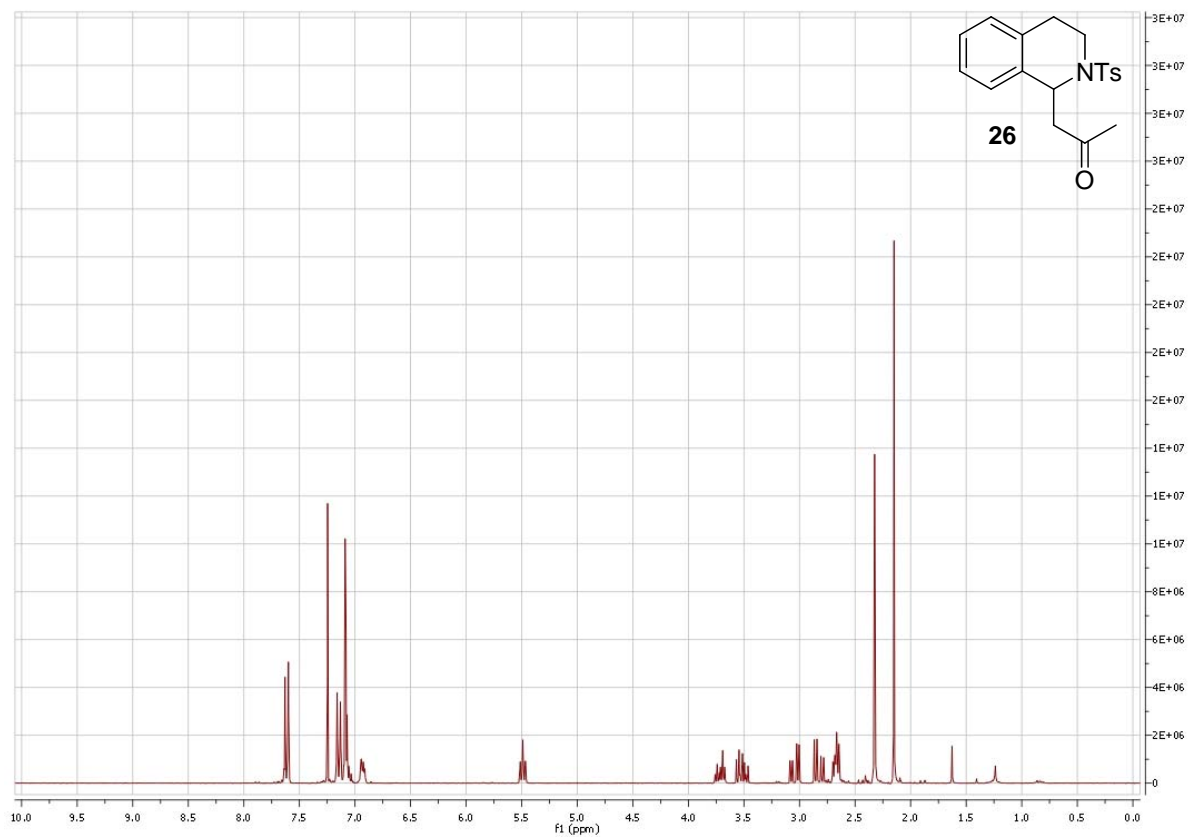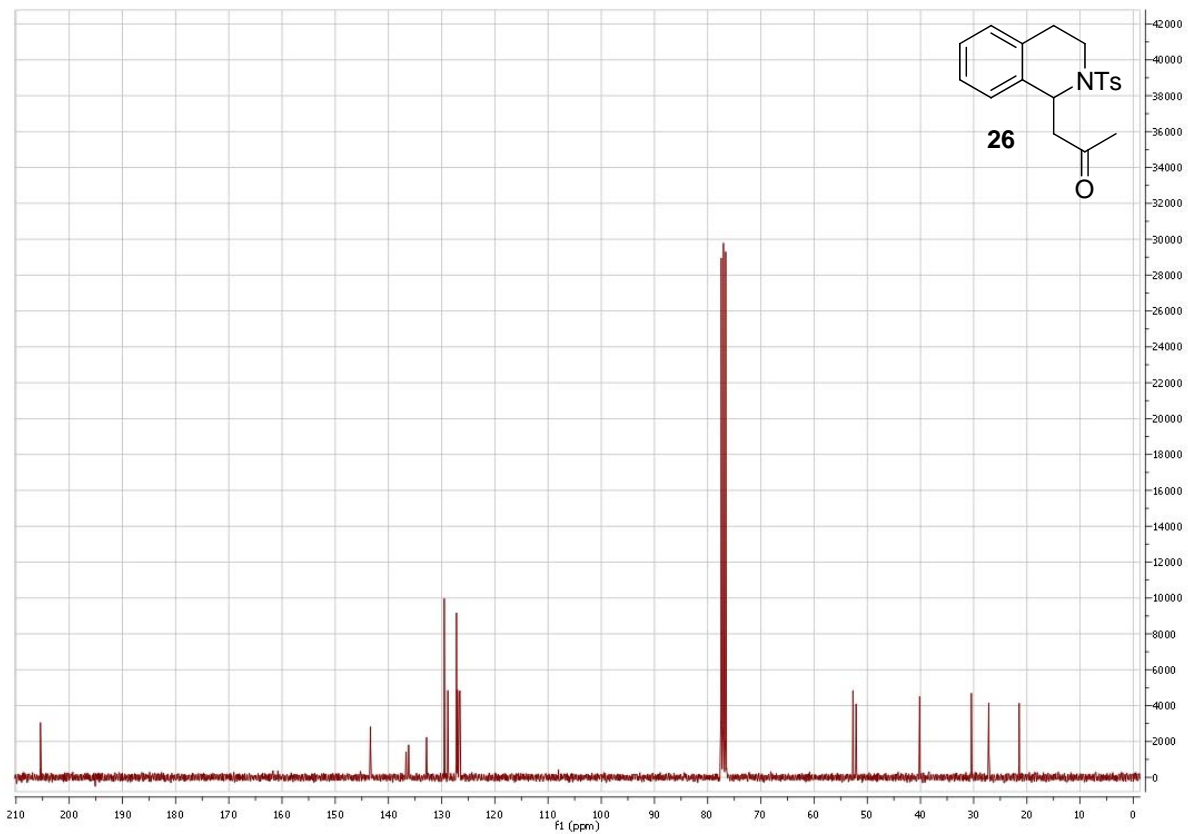



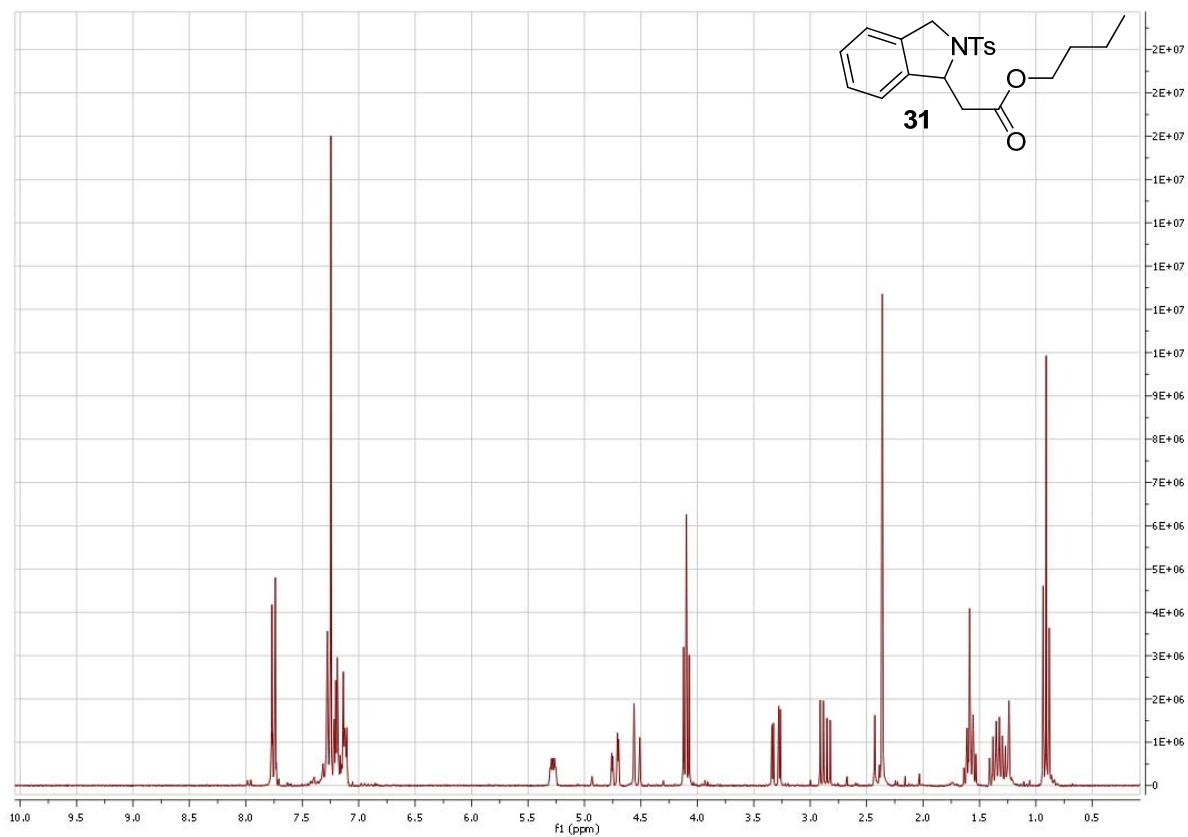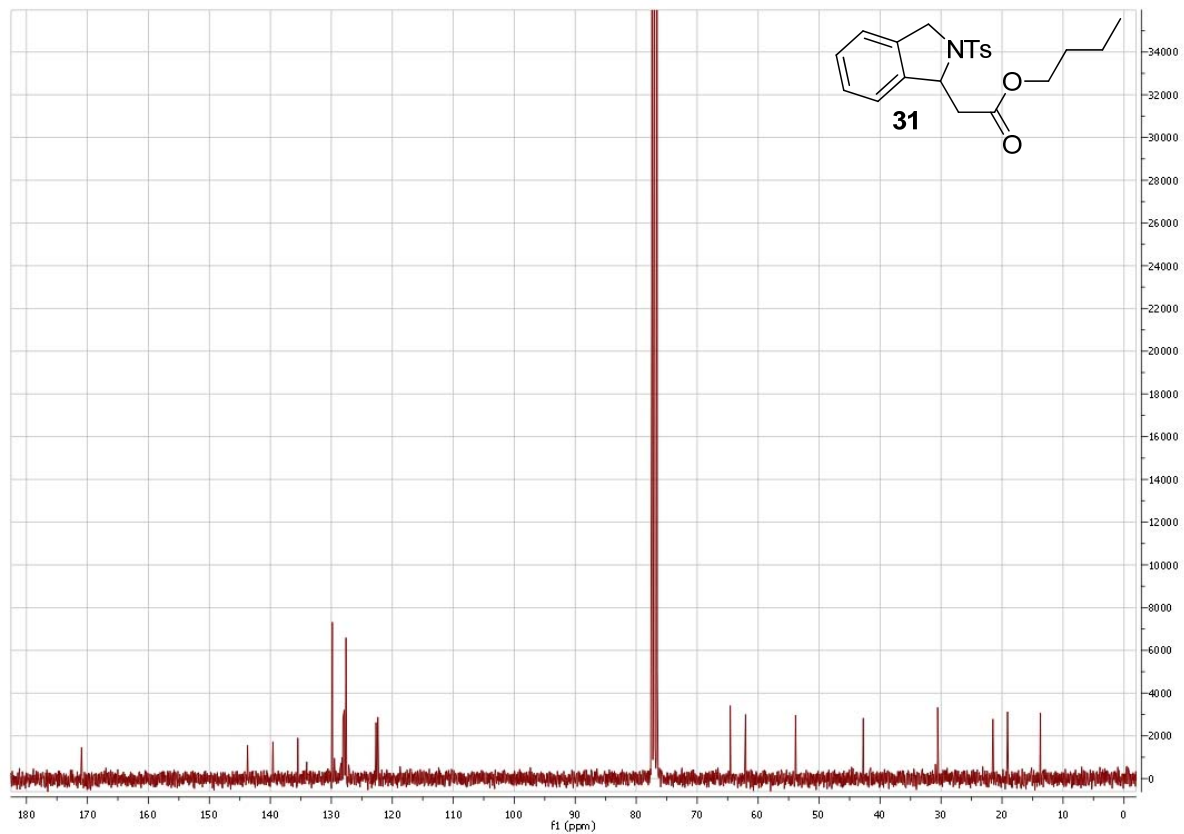

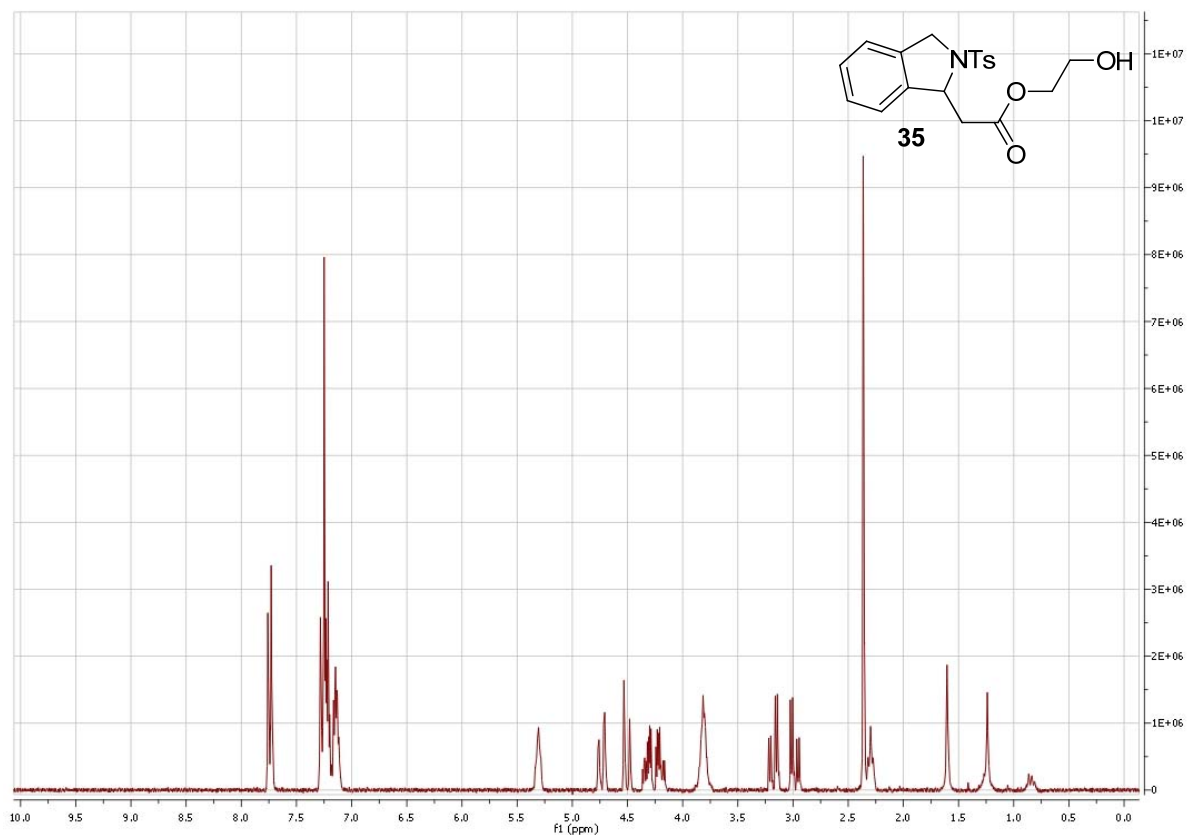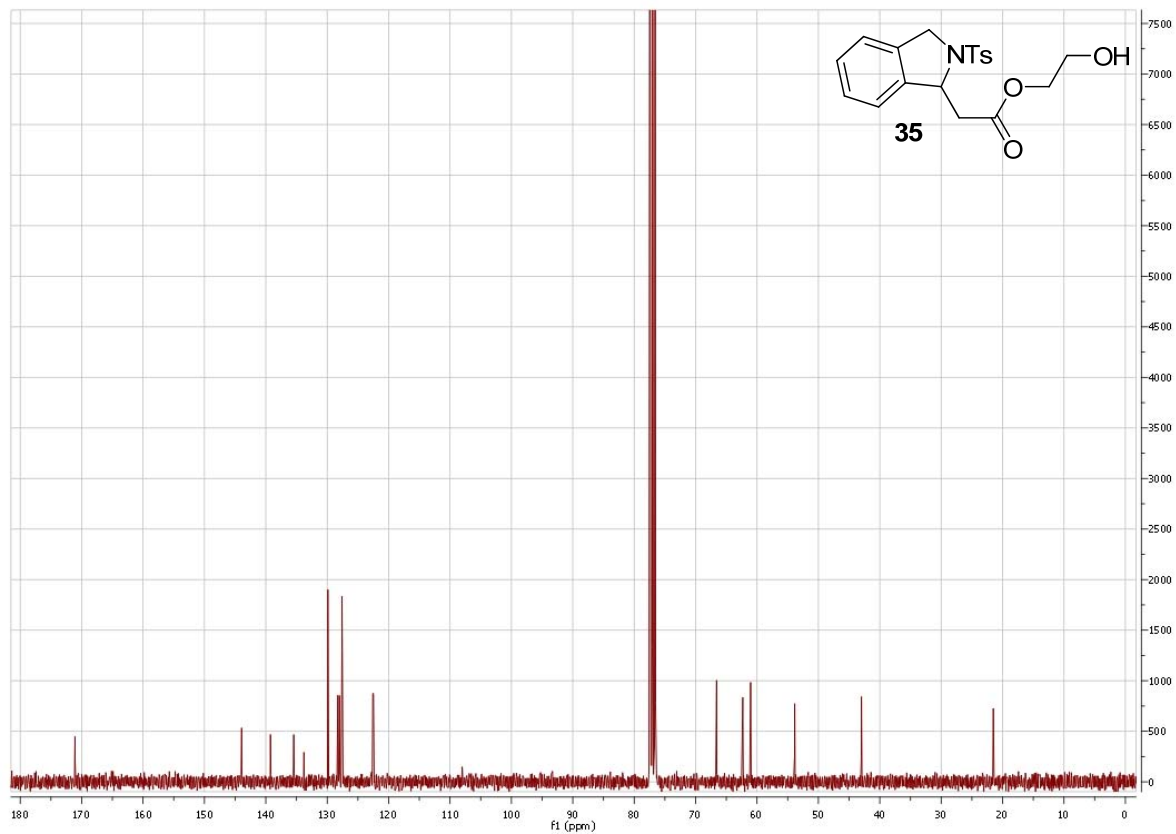

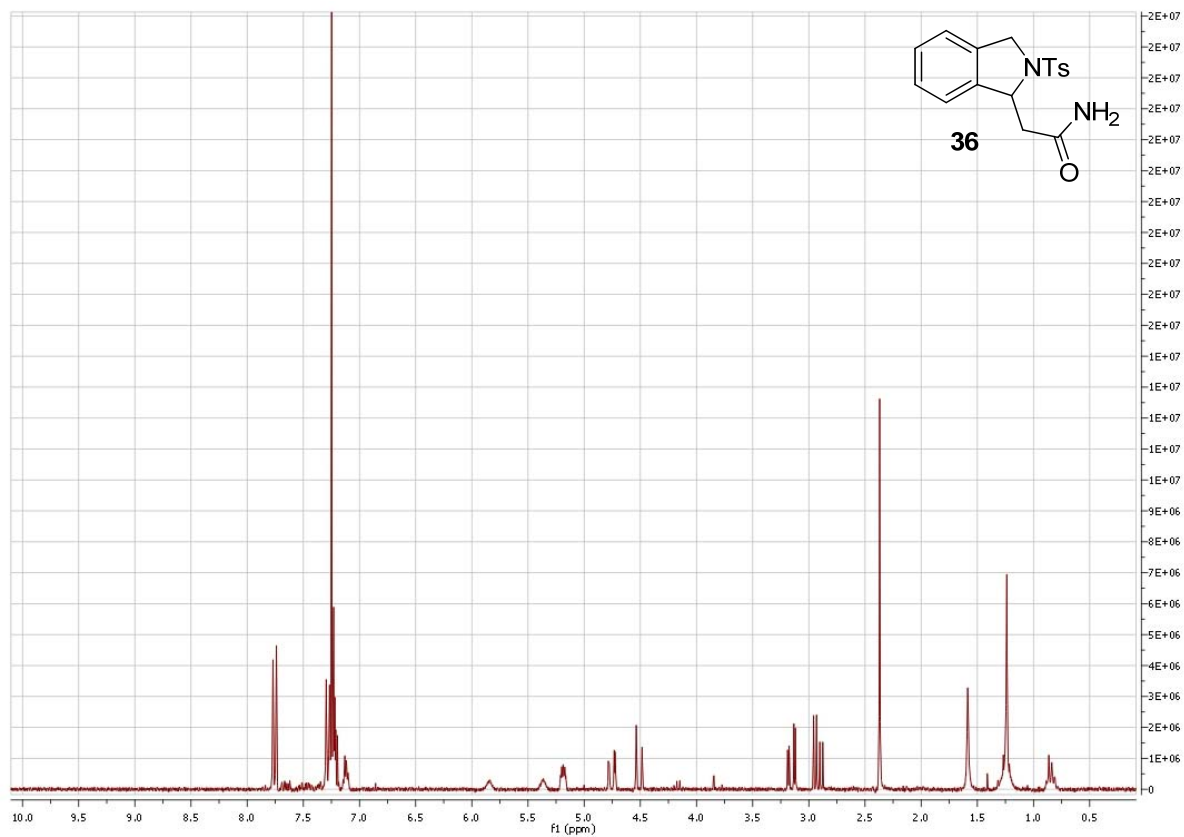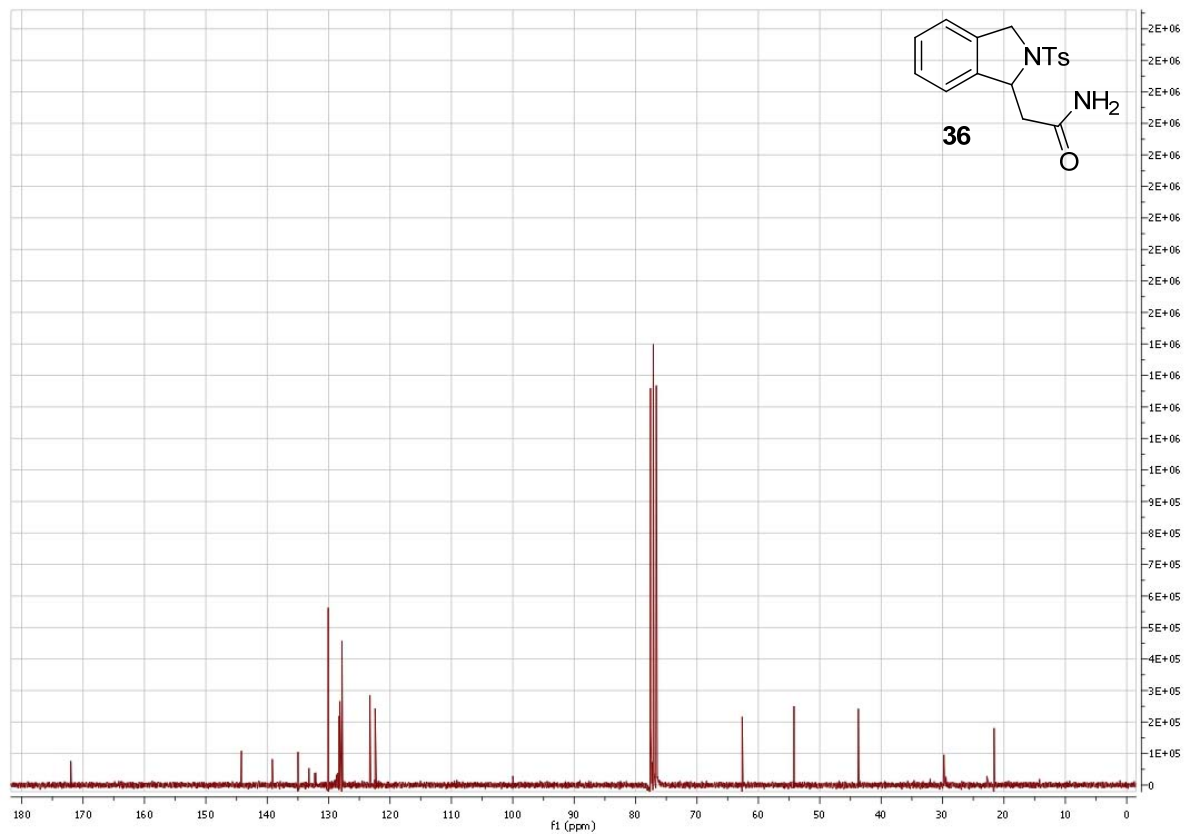

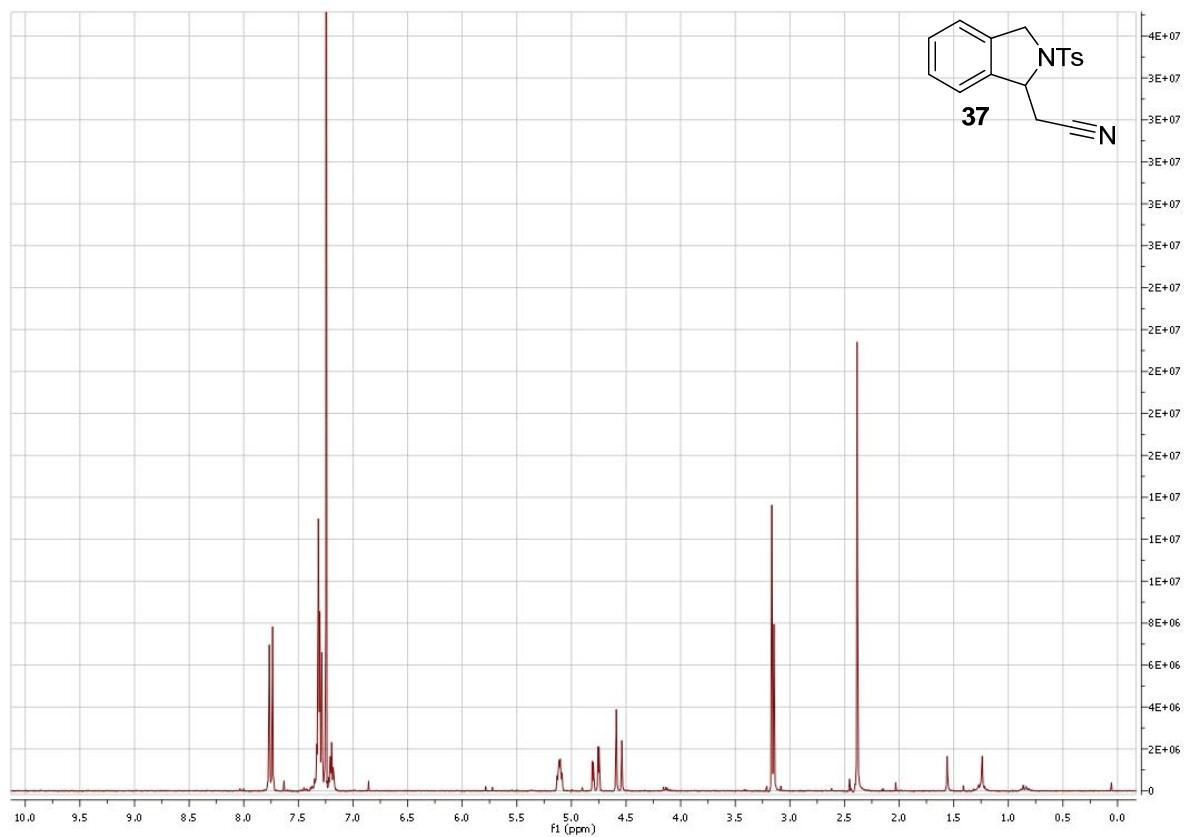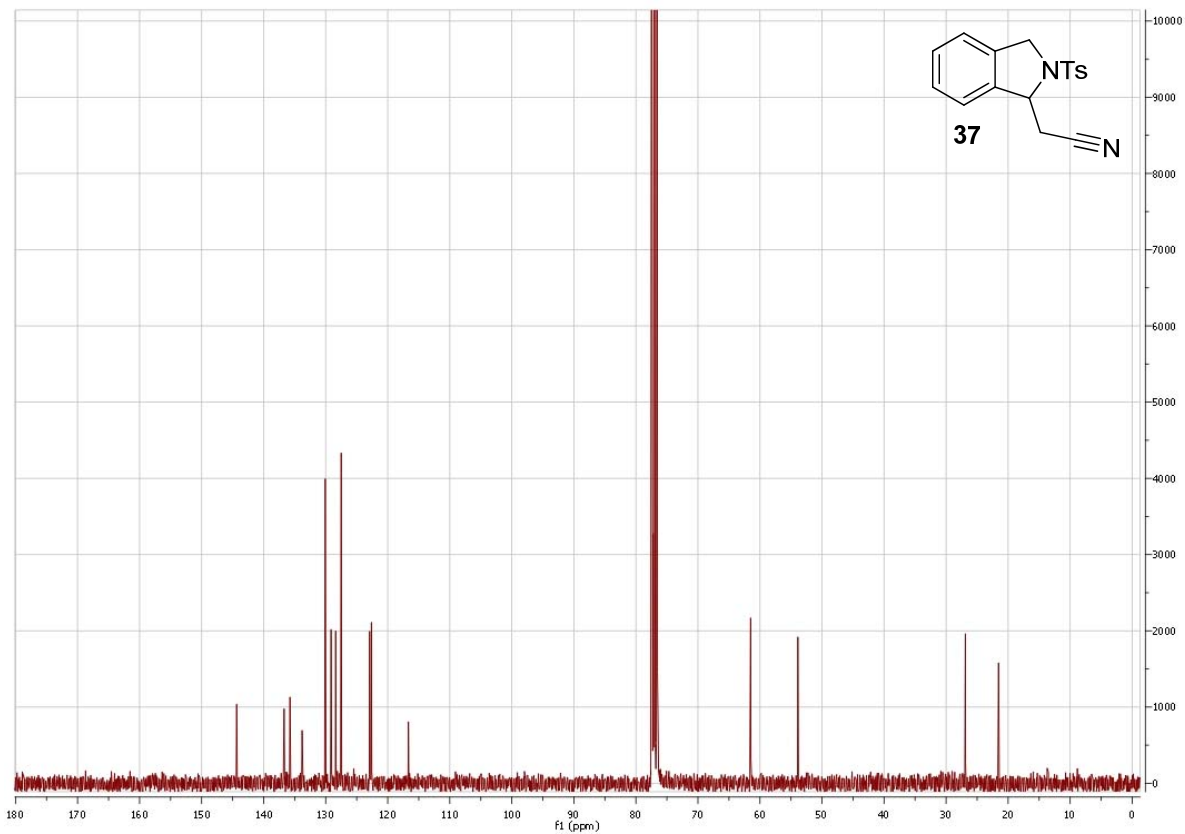

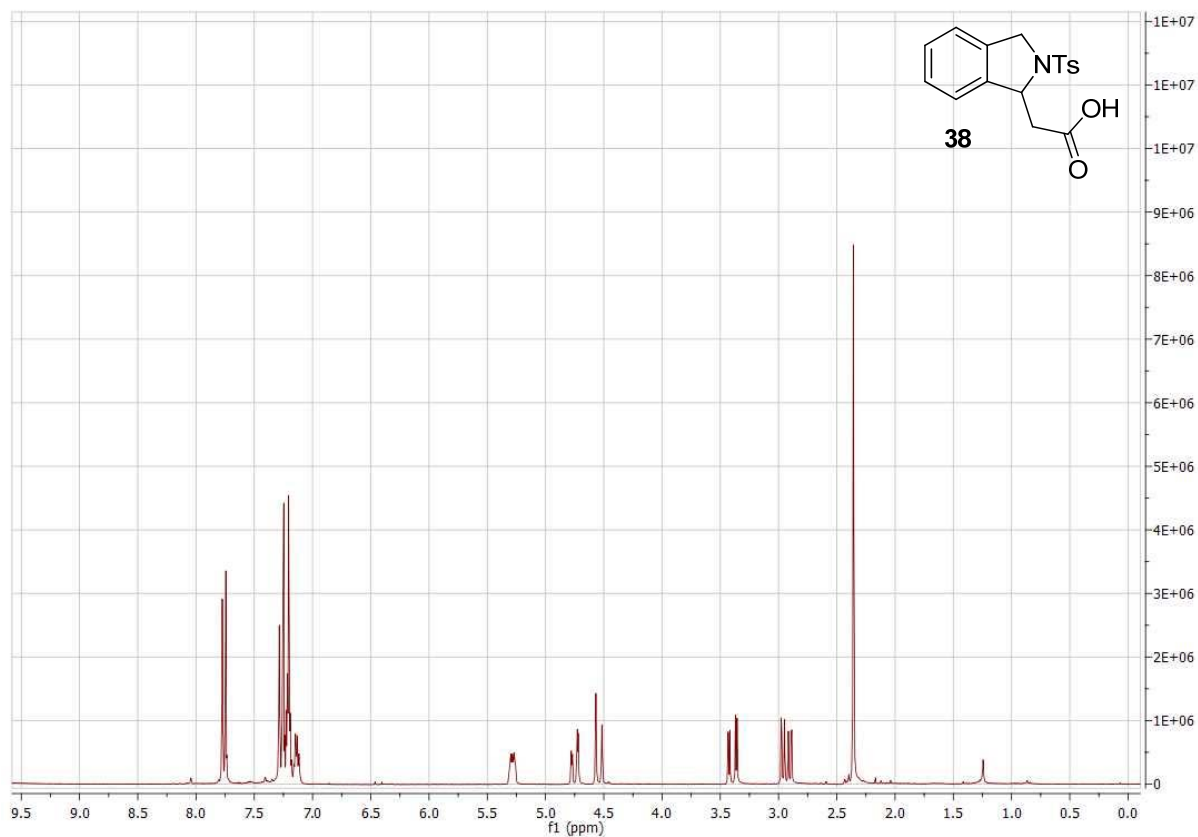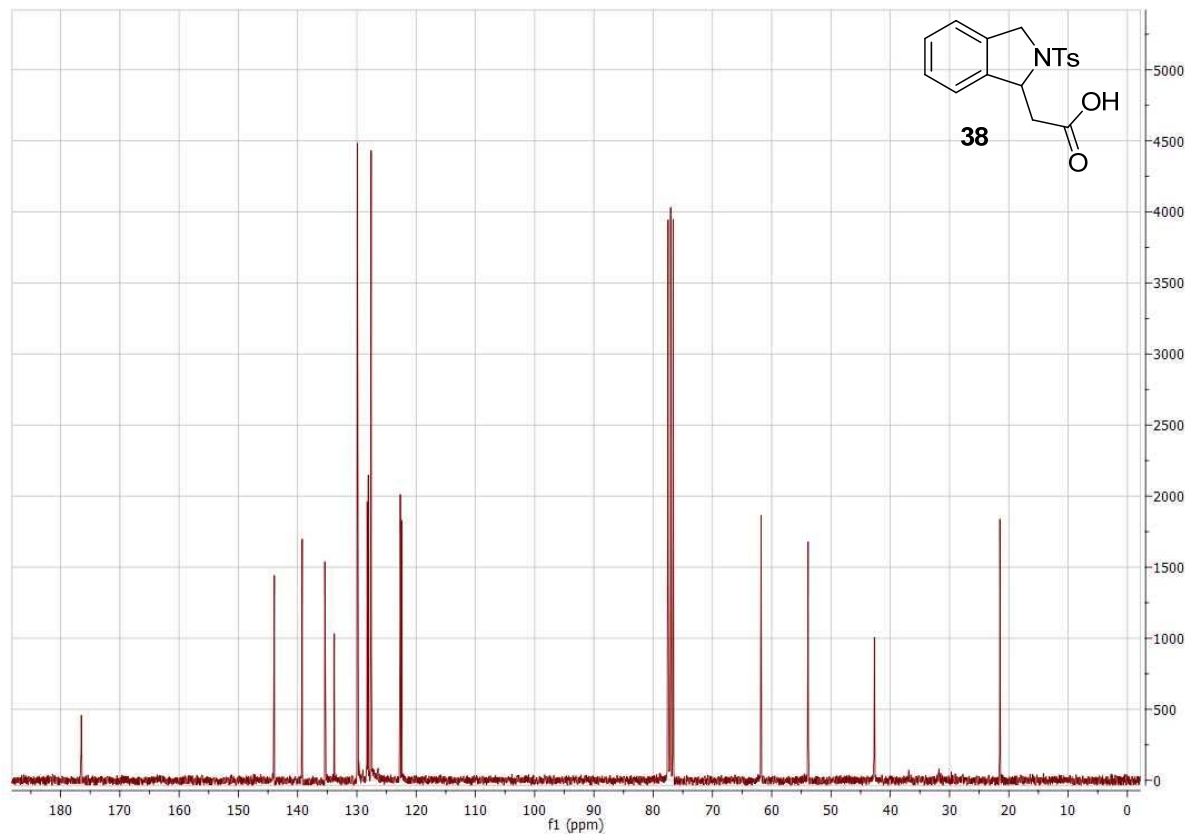

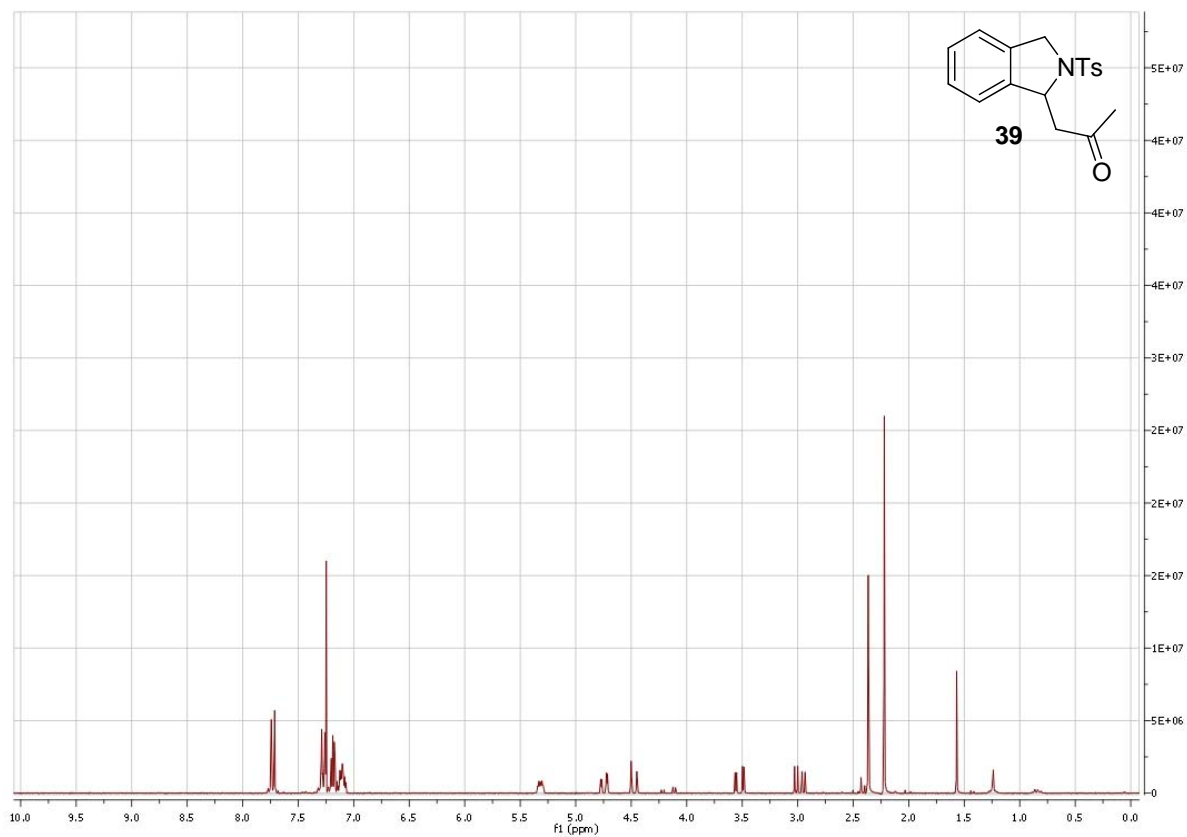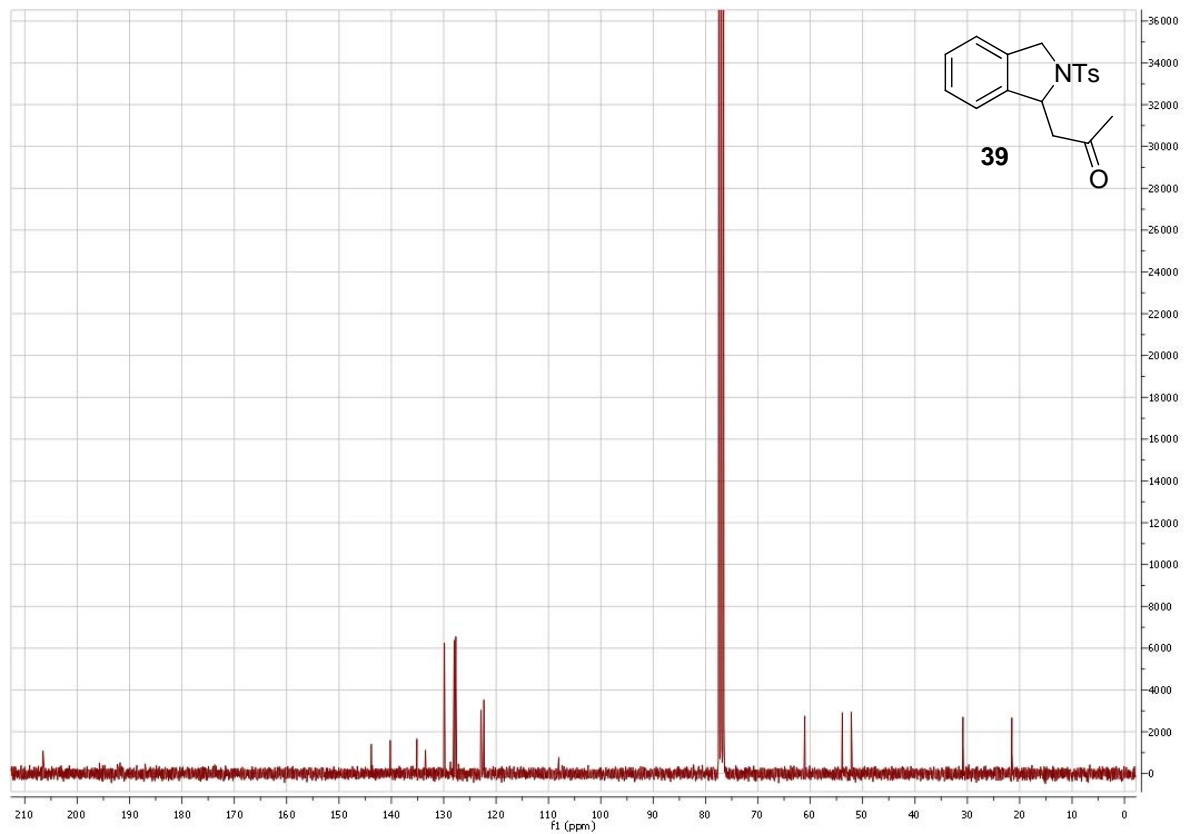

Supplement: c0ob00835d.pdf [file c0ob00835d.pdf]
